# Supplementary material for: The interrater reliability of static palpation of the thoracic spine for eliciting tenderness and stiffness to test for a manipulable lesion
Source: Springer Nature journal article supplement (doi:10.1186/s12998-018-0218-7), 2018-11-06
Supplement: MOESM1 [file 16314326]

**Additional file 1: Interexaminer reliability- Strict agreement- Pragmatic approach to assess segmental stiffness**

| <b>Spinal level</b> | <b>% Agreement</b> | <b>95% CI</b> | <b>Kappa</b> | <b>95%CI</b> | <b>PABAK</b> | <b>95% CI</b> | <b>Indicates</b>       | <b>Kappa max</b> |
|---------------------|--------------------|---------------|--------------|--------------|--------------|---------------|------------------------|------------------|
| T1 Left             | 83                 | 66, 93        | 0.18         | -0.22, 0.58  | 0.66         | 0.41, 0.91    | Substantial agreement  | 0.40             |
| T2 Left             | 80                 | 63, 92        | -0.09        | -0.18, 0.00  | 0.60         | 0.34, 0.86    | Moderate agreement     | -0.17            |
| T3 Left             | 74                 | 57, 88        | -0.10        | -0.21, 0.01  | 0.49         | 0.20, 0.77    | Moderate agreement     | -0.25            |
| T4 Left             | 63                 | 45, 79        | -0.07        | -0.35, 0.20  | 0.26         | -0.06, 0.58   | Fair agreement         | -0.12            |
| T5 Left             | 77                 | 60, 90        | 0.20         | -0.19, 0.59  | 0.54         | 0.26, 0.82    | Moderate agreement     | 0.25             |
| T6 Left             | 77                 | 60, 90        | -0.09        | -0.20, 0.01  | 0.54         | 0.26, 0.82    | Moderate agreement     | -0.21            |
| T7 Left             | 80                 | 63, 92        | -0.05        | -0.14, 0.04  | 0.60         | 0.33, 0.86    | Moderate agreement     | -0.21            |
| T8 Left             | 77                 | 60, 90        | -0.12        | -0.21, -0.03 | 0.54         | 0.26, 0.82    | Moderate agreement     | -0.17            |
| T9 Left             | 66                 | 48, 81        | 0.05         | -0.17, 0.27  | 0.31         | -0.01, 0.63   | Fair agreement         | 0.24             |
| T10 Left            | 83                 | 66, 93        | -0.09        | -0.17, -0.02 | 0.66         | 0.41, 0.91    | Substantial agreement  | -0.09            |
| T11 Left            | 86                 | 70, 95        | -0.05        | -0.13, 0.03  | 0.71         | 0.48, 0.95    | Substantial agreement  | -0.13            |
| T12 Left            | 86                 | 70, 95        | -0.05        | -0.13, 0.00  | 0.71         | 0.48, 0.95    | Substantial agreement  | -0.05            |
| T1 Right            | 51                 | 34, 69        | -0.31        | -0.46, 0.15  | 0.03         | -0.30, 0.36   | Slight agreement       | -0.40            |
| T2 Right            | 63                 | 45, 79        | 0.11         | -0.20, 0.41  | 0.26         | -0.06, 0.58   | Fair agreement         | 0.20             |
| T3 Right            | 74                 | 57, 88        | 0.03         | -0.32, 0.38  | 0.49         | 0.20, 0.77    | Moderate agreement     | 0.03             |
| T4 Right            | 83                 | 66, 93        | 0.47         | 0.11, 0.83   | 0.66         | 0.41, 0.91    | Substantial agreement  | 0.57             |
| T5 Right            | 63                 | 45, 79        | 0.16         | -0.18, 0.50  | 0.26         | -0.06, 0.58   | Fair agreement         | 0.17             |
| T6 Right            | 57                 | 39, 74        | 0.04         | 0.29, 0.36   | 0.14         | -0.18, 0.47   | Slight agreement       | 0.05             |
| T7 Right            | 43                 | 26, 61        | -0.17        | -0.49, 0.14  | -0.14        | -0.47, 0.18   | Below chance agreement | -0.23            |
| T8 Right            | 53                 | 37, 71        | 0.05         | -0.28, 0.38  | 0.09         | -0.24, 0.42   | Slight agreement       | 0.04             |
| T9 Right            | 60                 | 42, 76        | 0.02         | -0.31, 0.36  | 0.20         | -0.12, 0.52   | Slight agreement       | 0.03             |
| T10 Right           | 51                 | 34, 69        | -0.05        | -0.35, 0.24  | 0.03         | -0.30, 0.36   | Slight agreement       | -0.09            |
| T11 Right           | 66                 | 48, 81        | -0.21        | -0.32, -0.09 | 0.31         | -0.01, 0.63   | Fair agreement         | -0.21            |
| T12 Right           | 71                 | 54, 85        | -0.14        | -0.25, -0.02 | 0.43         | 0.13, 0.73    | Moderate agreement     | -0.25            |
