# Supplementary material for: The interrater reliability of static palpation of the thoracic spine for eliciting tenderness and stiffness to test for a manipulable lesion
Source: Springer Nature journal article supplement (doi:10.1186/s12998-018-0218-7), 2018-11-06
Supplement: MOESM2 [file 16314326]

**Additional file 2: Interexaminer reliability- Strict agreement- Standardized approach to assess segmental stiffness**

| Spinal level | % Agreement | 95% CI | Kappa | 95%CI       | PABAK | 95% CI      | Indicates             | Kappa max |
|--------------|-------------|--------|-------|-------------|-------|-------------|-----------------------|-----------|
| T1 Left      | 65          | 46, 80 | -0.11 | -0.24, 0.03 | 0.29  | -0.03, 0.62 | Fair agreement        | -0.42     |
| T2 Left      | 62          | 44, 78 | 0.01  | -0.30, 0.32 | 0.23  | -0.09, 0.56 | Fair agreement        | 0.01      |
| T3 Left      | 56          | 38, 73 | -0.01 | -0.01, 0.00 | 0.12  | -0.22, 0.45 | Slight agreement      | -0.01     |
| T4 Left      | 65          | 46, 80 | 0.04  | -0.29, 0.36 | 0.29  | -0.03, 0.61 | Fair agreement        | 0.05      |
| T5 Left      | 62          | 44, 78 | -0.01 | -0.33, 0.32 | 0.23  | -0.09, 0.56 | Fair agreement        | -0.01     |
| T6 Left      | 65          | 46, 80 | 0.05  | -0.17, 0.27 | 0.29  | -0.03, 0.61 | Fair agreement        | 0.23      |
| T7 Left      | 79          | 62, 91 | 0.24  | -0.17, 0.65 | 0.59  | 0.32, 0.86  | Moderate agreement    | 0.27      |
| T8 Left      | 71          | 53, 85 | -0.10 | -0.23, 0.02 | 0.41  | 0.10, 0.72  | Moderate agreement    | -0.31     |
| T9 Left      | 88          | 73, 97 | -0.06 | -0.12, 0.00 | 0.76  | 0.55, 0.98  | Substantial agreement | -0.06     |
| T10 Left     | 74          | 56, 87 | -0.06 | -0.15, 0.04 | 0.48  | 0.17, 0.77  | Moderate agreement    | -0.31     |
| T11 Left     | 82          | 65, 93 | 0.21  | -0.14, 0.56 | 0.65  | 0.39, 0.90  | Substantial agreement | 1.00      |
| T12 Left     | 79          | 62, 91 | -0.01 | -0.01, 0.00 | 0.59  | 0.32, 0.86  | Moderate agreement    | -0.01     |
| T1 Right     | 88          | 73, 97 | -0.05 | -0.12, 0.02 | 0.76  | 0.55, 0.98  | Substantial agreement | -0.09     |
| T2 Right     | 76          | 59, 89 | 0.07  | -0.30, 0.43 | 0.53  | 0.24, 0.81  | Moderate agreement    | 0.09      |
| T3 Right     | 68          | 49, 83 | -0.01 | -0.01, 0.00 | 0.35  | 0.04, 0.67  | Fair agreement        | -0.01     |
| T4 Right     | 65          | 46, 80 | 0.02  | -0.31, 0.36 | 0.29  | -0.03, 0.61 | Fair agreement        | 0.03      |
| T5 Right     | 65          | 46, 80 | -0.06 | -0.35, 0.23 | 0.29  | -0.03, 0.61 | Fair agreement        | -0.09     |
| T6 Right     | 71          | 53, 85 | 0.19  | -0.17, 0.55 | 0.41  | 0.10, 0.72  | Moderate agreement    | 0.23      |
| T7 Right     | 68          | 49, 83 | 0.25  | -0.09, 0.59 | 0.35  | 0.04, 0.67  | Fair agreement        | 0.30      |
| T8 Right     | 68          | 49, 83 | -0.01 | -0.30, 0.28 | 0.35  | 0.04, 0.67  | Fair agreement        | -0.02     |
| T9 Right     | 79          | 62, 91 | 0.34  | -0.05, 0.72 | 0.59  | 0.32, 0.86  | Moderate agreement    | 0.37      |
| T10 Right    | 62          | 44, 78 | 0.20  | -0.13, 0.54 | 0.23  | -0.09, 0.56 | Fair agreement        | 0.21      |
| T11 Right    | 71          | 53, 85 | -0.01 | -0.33, 0.32 | 0.41  | 0.10, 0.72  | Moderate agreement    | -0.01     |
| T12 Right    | 85          | 69, 95 | 0.53  | 0.16, 0.89  | 0.71  | 0.47, 0.94  | Substantial agreement | 0.58      |
