# Supplementary material for: The interrater reliability of static palpation of the thoracic spine for eliciting tenderness and stiffness to test for a manipulable lesion
Source: Springer Nature journal article supplement (doi:10.1186/s12998-018-0218-7), 2018-11-06
Supplement: MOESM3 [file 16314326]

**Additional file 3: Interexaminer reliability- Strict agreement- Pragmatic approach to assess segmental tenderness**

| <b>Spinal level</b> | <b>% Agreement</b> | <b>95% CI</b> | <b>Kappa</b> | <b>95%CI</b> | <b>PABAK</b> | <b>95% CI</b> | <b>Indicates</b>      | <b>Kappa max</b> |
|---------------------|--------------------|---------------|--------------|--------------|--------------|---------------|-----------------------|------------------|
| T1 Left             | 83                 | 66, 93        | 0.63         | 0.36, 0.89   | 0.66         | 0.41, 0.91    | Substantial agreement | 0.83             |
| T2 Left             | 86                 | 70, 95        | 0.72         | 0.49, 0.94   | 0.71         | 0.48, 0.95    | Substantial agreement | 0.86             |
| T3 Left             | 63                 | 45, 79        | 0.28         | 0.01, 0.55   | 0.26         | -0.06, 0.58   | Fair agreement        | 0.50             |
| T4 Left             | 63                 | 45, 79        | 0.32         | 0.07, 0.56   | 0.26         | -0.06, 0.58   | Fair agreement        | 0.75             |
| T5 Left             | 74                 | 57, 88        | 0.51         | 0.27, 0.75   | 0.49         | 0.20, 0.77    | Moderate agreement    | 1.00             |
| T6 Left             | 71                 | 54, 85        | 0.46         | 0.22, 0.70   | 0.43         | 0.13, 0.73    | Moderate agreement    | 1.00             |
| T7 Left             | 77                 | 60, 90        | 0.55         | 0.28, 0.82   | 0.54         | 0.26, 0.82    | Moderate agreement    | 0.71             |
| T8 Left             | 80                 | 63, 92        | 0.60         | 0.36, 0.86   | 0.60         | 0.33, 0.86    | Moderate agreement    | 0.84             |
| T9 Left             | 60                 | 42, 76        | 0.26         | 0.00, 0.52   | 0.20         | -0.12, 0.52   | Slight agreement      | 0.55             |
| T10 Left            | 69                 | 51, 83        | 0.41         | 0.16, 0.66   | 0.37         | 0.06, 0.68    | Fair agreement        | 0.79             |
| T11 Left            | 71                 | 54, 85        | 0.45         | 0.19, 0.71   | 0.43         | 0.13, 0.73    | Moderate agreement    | 0.80             |
| T12 Left            | 74                 | 57, 88        | 0.48         | 0.19, 0.77   | 0.49         | 0.20, 0.77    | Moderate agreement    | 0.51             |
| T1 Right            | 80                 | 63, 92        | 0.58         | 0.31, 0.85   | 0.60         | 0.33, 0.86    | Moderate agreement    | 0.71             |
| T2 Right            | 74                 | 57, 88        | 0.46         | 0.16, 0.76   | 0.49         | 0.20, 0.77    | Moderate agreement    | 0.49             |
| T3 Right            | 63                 | 45, 79        | 0.22         | -0.11, 0.55  | 0.26         | -0.06, 0.58   | Fair agreement        | 0.23             |
| T4 Right            | 74                 | 57, 88        | 0.43         | 0.13, 0.73   | 0.48         | 0.20, 0.78    | Moderate agreement    | 0.62             |
| T5 Right            | 83                 | 66, 93        | 0.60         | 0.32, 0.89   | 0.66         | 0.41, 0.91    | Substantial agreement | 0.69             |
| T6 Right            | 80                 | 63, 92        | 0.49         | 0.17, 0.82   | 0.60         | 0.33, 0.86    | Moderate agreement    | 0.53             |
| T7 Right            | 71                 | 54, 85        | 0.34         | 0.01, 0.67   | 0.43         | 0.13, 0.73    | Moderate agreement    | 0.39             |
| T8 Right            | 80                 | 63, 92        | 0.55         | 0.25, 0.84   | 0.60         | 0.33, 0.86    | Moderate agreement    | 0.58             |
| T9 Right            | 71                 | 54, 85        | 0.43         | 0.14, 0.72   | 0.43         | 0.13, 0.73    | Moderate agreement    | 0.56             |
| T10 Right           | 77                 | 60, 90        | 0.53         | 0.25, 0.81   | 0.54         | 0.26, 0.82    | Moderate agreement    | 0.69             |
| T11 Right           | 86                 | 70, 95        | 0.70         | 0.46, 0.94   | 0.71         | 0.48, 0.95    | Substantial agreement | 0.85             |
| T12 Right           | 89                 | 73, 97        | 0.77         | 0.55, 0.98   | 0.77         | 0.56, 0.98    | Substantial agreement | 0.87             |
