# Supplementary material for: The interrater reliability of static palpation of the thoracic spine for eliciting tenderness and stiffness to test for a manipulable lesion
Source: Springer Nature journal article supplement (doi:10.1186/s12998-018-0218-7), 2018-11-06
Supplement: MOESM4 [file 16314326]

**Additional file 4: Interexaminer reliability- Strict agreement- Standardized approach to assess segmental tenderness**

| Spinal level | % Agreement | 95% CI | Kappa | 95%CI       | PABAK | 95% CI      | Indicates             | Kappa max |
|--------------|-------------|--------|-------|-------------|-------|-------------|-----------------------|-----------|
| T1 Left      | 88          | 73, 97 | 0.70  | 0.44, 0.96  | 0.76  | 0.55, 0.98  | Substantial agreement | 1.00      |
| T2 Left      | 68          | 49, 83 | 0.32  | 0.00, 0.65  | 0.35  | 0.04, 0.67  | Fair agreement        | 0.35      |
| T3 Left      | 68          | 49, 83 | 0.34  | 0.03, 0.66  | 0.35  | 0.04, 0.67  | Fair agreement        | 0.42      |
| T4 Left      | 76          | 59, 89 | 0.52  | 0.25, 0.79  | 0.53  | 0.24, 0.81  | Moderate agreement    | 0.81      |
| T5 Left      | 62          | 44, 78 | 0.25  | -0.06, 0.56 | 0.23  | -0.09, 0.56 | Fair agreement        | 0.35      |
| T6 Left      | 79          | 62, 91 | 0.58  | 0.32, 0.84  | 0.59  | 0.32, 0.86  | Moderate agreement    | 0.83      |
| T7 Left      | 74          | 56, 87 | 0.43  | 0.12, 0.74  | 0.47  | 0.17, 0.77  | Moderate agreement    | 0.46      |
| T8 Left      | 76          | 59, 89 | 0.51  | 0.22, 0.80  | 0.53  | 0.24, 0.81  | Moderate agreement    | 0.67      |
| T9 Left      | 79          | 62, 91 | 0.57  | 0.29, 0.85  | 0.59  | 0.32, 0.86  | Moderate agreement    | 0.61      |
| T10 Left     | 68          | 49, 83 | 0.28  | -0.06, 0.61 | 0.35  | 0.04, 0.67  | Fair agreement        | 0.30      |
| T11 Left     | 79          | 62, 91 | 0.49  | 0.18, 0.81  | 0.59  | 0.32, 0.86  | Moderate agreement    | 0.63      |
| T12 Left     | 76          | 59, 89 | 0.44  | 0.13, 0.76  | 0.53  | 0.24, 0.81  | Moderate agreement    | 0.61      |
| T1 Right     | 82          | 65, 93 | 0.61  | 0.35, 0.87  | 0.65  | 0.39, 0.90  | substantial agreement | 1.00      |
| T2 Right     | 65          | 46, 80 | 0.35  | 0.10, 0.60  | 0.29  | -0.03, 0.61 | Fair agreement        | 0.76      |
| T3 Right     | 76          | 59, 89 | 0.50  | 0.21, 0.80  | 0.53  | 0.24, 0.81  | Moderate agreement    | 0.58      |
| T4 Right     | 62          | 44, 78 | 0.25  | -0.04, 0.55 | 0.24  | -0.09, 0.56 | Fair agreement        | 0.42      |
| T5 Right     | 71          | 53, 85 | 0.41  | 0.13, 0.70  | 0.41  | 0.10, 0.72  | Moderate agreement    | 0.64      |
| T6 Right     | 62          | 44, 78 | 0.31  | 0.06, 0.55  | 0.23  | -0.09, 0.56 | Fair agreement        | 0.74      |
| T7 Right     | 65          | 46, 80 | 0.35  | 0.10, 0.60  | 0.29  | -0.03, 0.61 | Fair agreement        | 0.76      |
| T8 Right     | 68          | 49, 83 | 0.39  | 0.14, 0.65  | 0.35  | 0.04, 0.67  | Fair agreement        | 0.78      |
| T9 Right     | 68          | 49, 83 | 0.38  | 0.12, 0.64  | 0.35  | 0.04, 0.67  | Fair agreement        | 0.81      |
| T10 Right    | 68          | 49, 83 | 0.38  | 0.12, 0.64  | 0.35  | 0.04, 0.67  | Fair agreement        | 0.78      |
| T11 Right    | 85          | 69, 95 | 0.69  | 0.45, 0.93  | 0.71  | 0.47, 0.94  | Substantial agreement | 0.84      |
| T12 Right    | 76          | 59, 89 | 0.53  | 0.28, 0.79  | 0.53  | 0.24, 0.81  | Moderate agreement    | 1.00      |
